# Supplementary material for: Proton controlled intramolecular photoinduced electron transfer (PET) in podand linked squaraine–aniline dyads
Source: Royal Society of Chemistry journal article supplement (doi:10.1039/b412913j), 2004-12-08
Supplement: b412913j.doc [file b412913j.doc]

***S1***

**Proton Controlled Intramolecular Photoinduced Electron Transfer (PET) in Podand Linked Squaraine-Aniline Dyads**

***Easwaran Arunkumar and Ayyappanpillai Ajayaghosh****

*Photosciences and Photonics Division, Regional Research Laboratory (CSIR), Trivandrum-695019, India.*

Fig. S1. Change in absorption spectra of **1a** (5.53 M)before() and after the addition of 0.95 mM () and 5 mM (---) TFA. There is no change in the absorption of **1a** upto 0.95 mM addition of TFA. However considerable enhancement in emission is observed (inset).

***S2***

Fig. S2. Change in absorption spectra of **2** (5.1 M)with the addition of TFA. Arrow shows the direction of absorption changes with the gradual addition of TFA (0-5 mM). In contrast to **1a** a continuous decrease in the absorption and emission can be seen. The corresponding change in the emission is shown in the inset.

Fig. S3. Change in absorption spectra of **3** (5.41 M)with the addition of TFA. Arrow shows the direction of absorption changes with gradual addition of TFA (0-5 mM). In contrast to **1a** a continuous decrease in the absorption and emission can be seen. The corresponding change in the emission is shown in the inset.

***S3***

Fig S4. Change in absorption spectra of **2** (5.3 M)with the addition of 400 mM of DMA. Arrow shows the direction of absorption changes with gradual addition of DMA. Inset shows the corresponding emission changes.
